# Supplementary material
Source: PubMed Central journal article supplement (PMC5008443)
Supplement: NIHMS69056-supplement-Supplementary_table_1.pdf [file NIHMS69056-supplement-Supplementary_table_1.pdf]

**Table S1*****fraction (%) of all *Enpp6*<sup>+</sup> cells that are also:***

|                 | <b>Olig2<sup>+</sup></b> | <b>Sox10<sup>+</sup></b> | <b>Pdgfra<sup>+</sup></b> | <b>CC1<sup>+</sup></b> | <b><i>Mbp</i><sup>+</sup> “spidery”</b> |
|-----------------|--------------------------|--------------------------|---------------------------|------------------------|-----------------------------------------|
| motor cortex    | 100                      | 97.3 ± 1.8               | 0                         | 98.2 ± 1.8             | 99.4 ± 0.6                              |
| sub-cortical WM | 100                      | 95.6 ± 2.1               | 0                         | 86.9 ± 3.8             | NA                                      |

**Supplementary Table 1****Characterization of *Enpp6*<sup>+</sup> cells in mouse brain sections.**

Cells were counted in sections of mouse forebrain that were subjected to ISH for *Enpp6* followed by immunolabeling for Olig2 or Sox10 (for all oligodendrocyte lineage cells), CC1 (for mature or maturing oligodendrocytes) or by ISH for *Pdgfra* (OPs) (Supplementary Fig. 3). Data from at least 3 sections from each of 3 mice (>1000 cells counted in total). Means ± s.e.m.
